# Supplementary material
Source: ML conference proceedings conference paper supplement (https://openaccess.thecvf.com/content/ACCV2020/html/Stoiber_A_Sparse_Gaussian_ACCV_2020_paper.html)
Supplement: Supplementary file 1 [file Stoiber_A_Sparse_Gaussian_ACCV_2020_supplemental.zip]

Archive with 2 entries (2 files):
- 0523-supp/0523-supp.mp4
- 0523-supp/0523-supp.pdf
